# Supplementary material
Source: HighWire-hosted journal article supplement (https://oem.bmj.com/content/73/10/663)

Online supplement figure 1

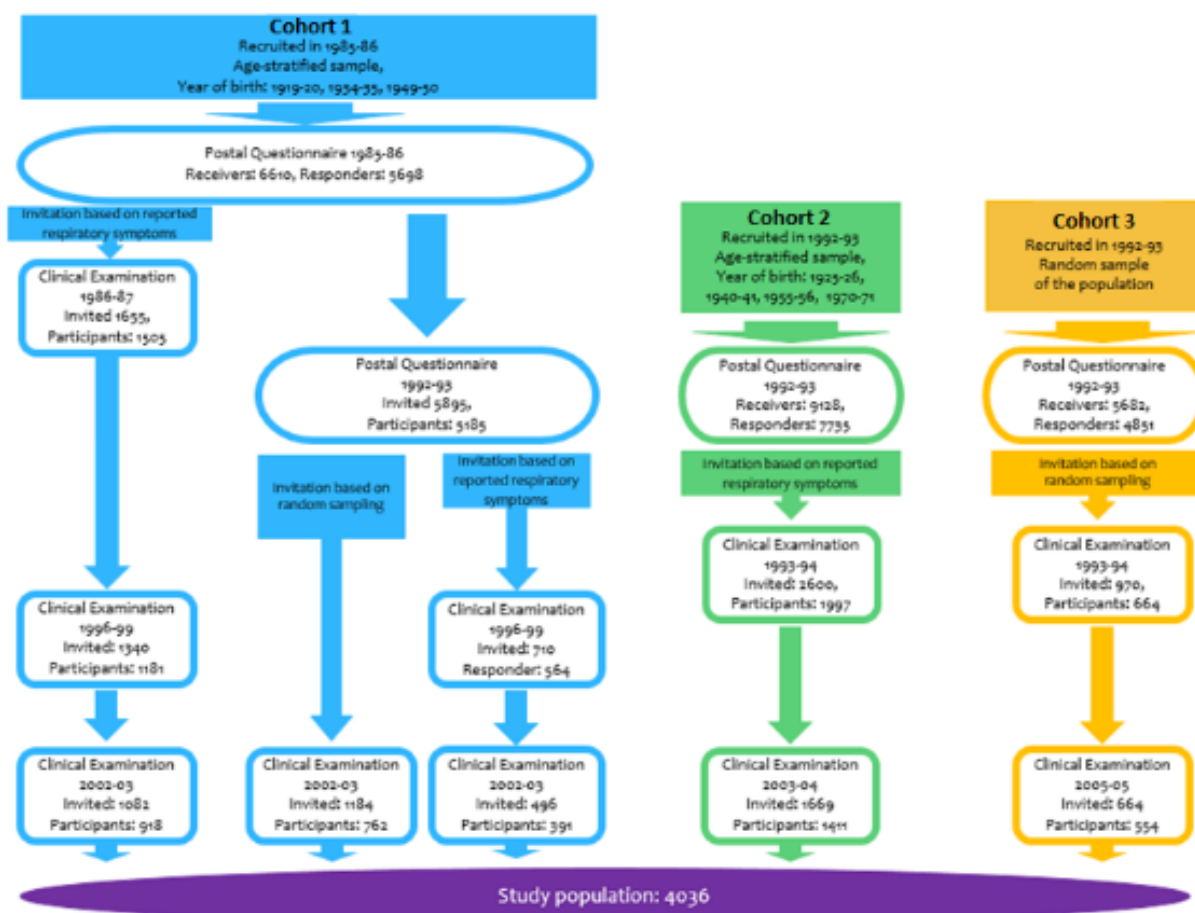

Online supplement figure 2

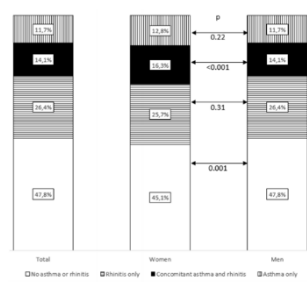

Online supplement figure 3

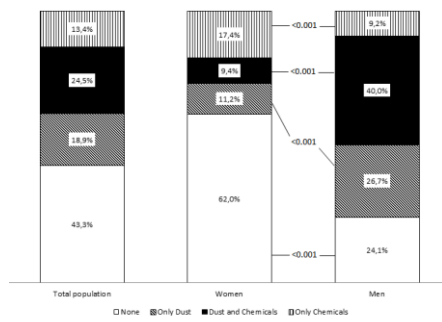

Online supplement figure 4

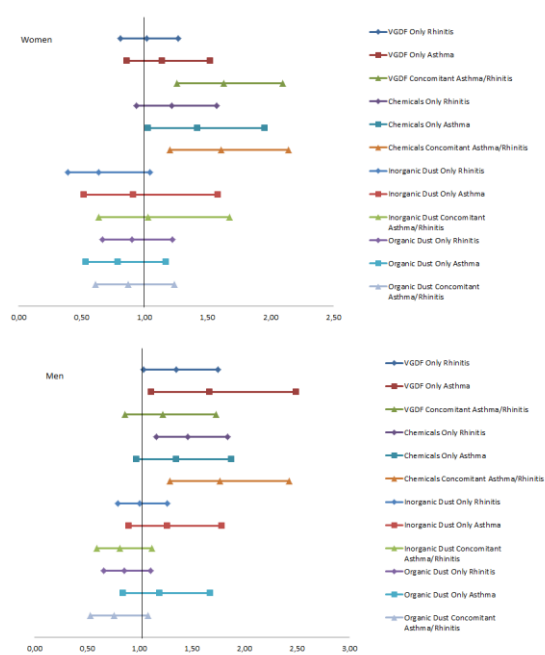

Supplement: inline-supplementary-material-1 [file inline-supplementary-material-1.pdf]
